# Supplementary material for: Protocol for a qualitative pilot study to explore ethical issues and stakeholder trust in the use of normothermic regional perfusion in organ donation in Canada
Source: HighWire-hosted journal article supplement (doi:10.1136/bmjopen-2022-067515), 2022-09-01
Supplement: bmjopen-2022-067515supp003_data_supplement.pdf [file bmjopen-2022-067515supp003_data_supplement.pdf]

8-15-2022

**Ethical issues in NRP – scoping review****Preliminary data extraction fields**

1. Author(s)
2. Year
3. Title
4. Journal
5. Country of publication
6. Publisher
7. Type of publication
8. Year of the data collection (if applicable)
9. Aim/purpose
10. Procedures, if applicable (interviews, ethical analysis, etc.)
11. Data analysis/methodology (if applicable)
12. Study Population (if applicable)
13. Study inclusion criteria (if applicable)
14. Study exclusion criteria (if applicable)
15. Main results/conclusions
16. Ethical issues identified (and supporting argument, if applicable)
17. Conceptual issues identified, in relation to ethical issues (and supporting argument)
18. Empirical issues identified, in relation to ethical issues
19. Study/report limitations stated by the author(s)
20. Author's overall suggestion for future studies and/or policies
